# Supplementary material
Source: PubMed Central journal article supplement (PMC3353000)
Supplement: mmc1.pdf [file mmc1.pdf]

## Supplementary Information

### Statistical Deconvolution for Super-Resolution Fluorescence Microscopy

Eran A. Mukamel<sup>1</sup>, Hazen Babcock<sup>2</sup> and Xiaowei Zhuang<sup>2</sup>

<sup>1</sup>Center for Brain Science, Harvard University, Cambridge, MA 02138, USA; present address: Center for Theoretical Biological Physics, University of California, San Diego, La Jolla, CA, 92037, USA.

<sup>2</sup>Department of Chemistry and Chemical Biology, Harvard University, Cambridge, Massachusetts, USA; Department of Physics, Harvard University, Cambridge, Massachusetts, USA; Howard Hughes Medical Institute, Harvard University, Cambridge, Massachusetts, USA.

Correspondence: emukamel@ucsd.edu, zhuang@chemistry.harvard.edu.

#### Contents

1. Supplementary Figures S1, S2
2. Supplementary Methods
3. Supplementary Software

## Supplementary Figures

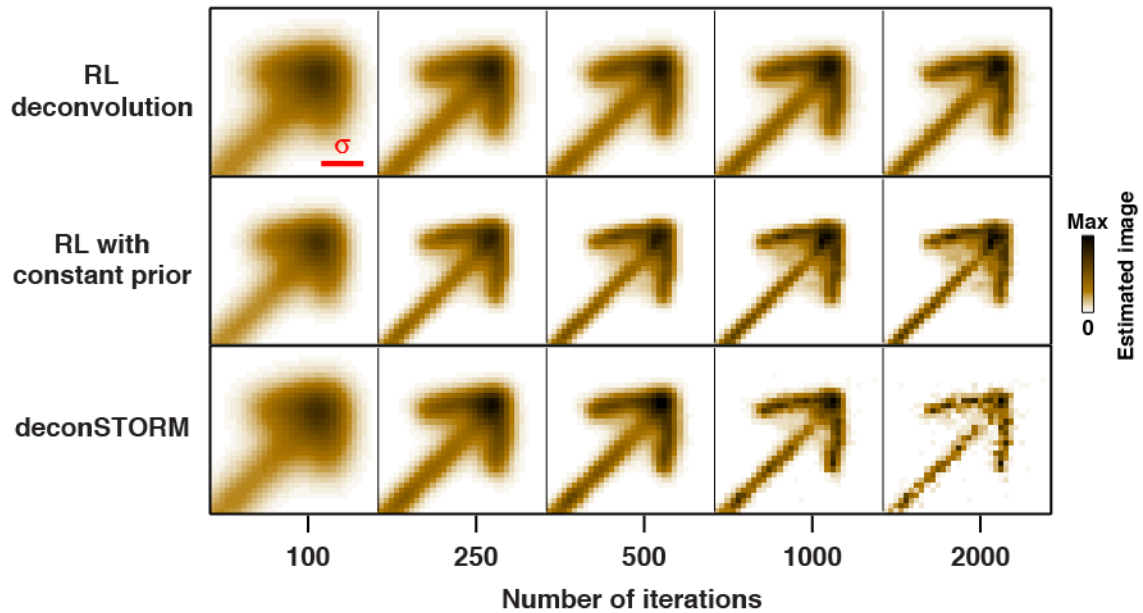

**FIGURE S1**

Effect of the number of iterations on deconvolution performance.  $\sigma$  is the width parameter of the Gaussian PSF. See detailed explanation of simulation methods in caption of Fig. 2.

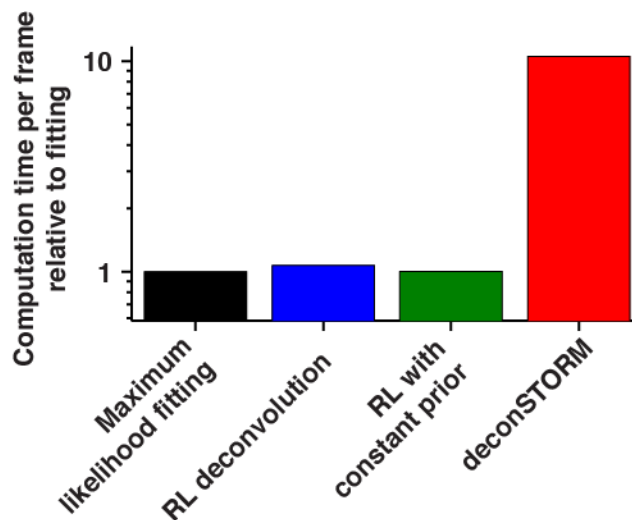

**FIGURE S2**

Computation time per movie frame for each algorithm, normalized to the computation time for the single-emitter maximum likelihood fitting method. All analyses were implemented in MATLAB and performed on a MacBook Pro with a 2.5 GHz Intel Core 2 Duo processor.

## Supplementary Methods

**Analysis of STORM images of cellular samples.** To test the image analysis methods on cellular samples, we recorded STORM images of microtubules in cells immunohistochemically labeled with the Alexa-647 dye. BS-C-1 cells were plated in 8-well chambered coverglasses (LabTek-II, Nalgene Nunc) and allowed to grow to near confluence. They were fixed with 3% paraformaldehyde and 0.1% glutaraldehyde in phosphate buffered saline (PBS) for 10 min, followed by a 7 min treatment with freshly prepared 0.1% sodium borohydride. Fixed samples were then washed thoroughly with PBS, and blocked with blocking buffer (BB, 3% w/v BSA, 0.1% v/v Triton X-100 in PBS) for 15 min. Samples were first labeled with mouse monoclonal anti-beta-tubulin primary antibody (T5201, Sigma) in BB, washed with PBS and then labeled with Donkey anti-mouse secondary antibody (715-005-150, Jackson Labs) conjugated with Alexa 405 and Alexa 647. Imaging was performed on a STORM microscope constructed as described previously (23). The amount of spatial overlap between adjacent activated fluorescent molecules was adjusted with the 405 nm activation laser.

Microtubule data shown in Fig. 4 consisted of 5000 fluorescence frames. For computational efficiency, we divided the data set into 8 segments with 625 frames each and analyzed each segment independently. Results from the 8 independent segments were combined by averaging the final estimates. The STORM analysis results use the single-emitter localization procedures that were described previously (23). This single-emitter localization analysis determined the following average parameters for all well-isolated emitters within the field of view: background fluorescence intensity,  $b = 102$  photons/pixel/frame; peak width parameter,  $\sigma = 173$  nm = 1.04 pixels; the average number of consecutive frames in which a given emitter remains active,  $1/\alpha = 2.2$ ; density of activated single emitters (excluding overlapping emitters),  $\rho = 0.34/\mu\text{m}^2/\text{frame}$ , which corresponds to activation rate  $\beta = 6.5 \times 10^{-5}$ . We used these parameters for the deconvolution analysis. For the gain parameters, we tested four values for  $\gamma$  and  $g$  and selected values ( $\gamma = 1/16$  and  $g = 1/256$ ) that, to our eyes, best balanced sharp detail and continuity of image features after  $n = 1000$  iterations. We found that the results were robust in that the final image was not substantially altered when the gain parameters varied between 50-200% of the selected values.

## Supplementary Software

A MATLAB toolbox for implementing the deconSTORM algorithm is available at <http://zhuang.harvard.edu/software.html>. Documentation is also provided at the same address.
